# Supplementary material for: A systematic review and meta-analyses of risk factors associated with lameness in dairy cows
Source: PubMed Central journal article supplement (PMC6796431; doi:10.1186/s12917-019-2095-2), 2019-10-16
Supplement: 12917_2019_2095_MOESM1_ESM.pdf [file 12917_2019_2095_MOESM1_ESM.pdf]

| <b>Study design</b>         | <b>Housing system</b>                                                    | <b>Number of studies in this category</b> |
|-----------------------------|--------------------------------------------------------------------------|-------------------------------------------|
| Cohort study                | No information on housing system                                         | 1                                         |
| Experiment                  | Deep litter barn with straw bedding and access to pasture                | 1                                         |
|                             | No information on housing system                                         | 1                                         |
|                             | No stall, fully roofed, open cowsheds with dried manure bedding material | 1                                         |
| Longitudinal field trial    | No information on housing system                                         | 1                                         |
| Observational study         | Loose/free housing (without further specification)                       | 3                                         |
|                             | Loose housing, brick paved (without further specification)               | 1                                         |
|                             | No information on housing system                                         | 14                                        |
|                             | Pasture-based                                                            | 18                                        |
|                             | Pasture-based + loose housing in straw pens                              | 1                                         |
|                             | Pasture-fed                                                              | 2                                         |
|                             | Zero-grazed (without further specification)                              | 2                                         |
| Review                      | No information on housing system                                         | 1                                         |
|                             | Pasture-fed                                                              | 2                                         |
| Randomised controlled trial | No information on housing system                                         | 1                                         |
|                             | Pasture-based                                                            | 2                                         |
