# Supplementary material for: A systematic review and meta-analyses of risk factors associated with lameness in dairy cows
Source: PubMed Central journal article supplement (PMC6796431; doi:10.1186/s12917-019-2095-2), 2019-10-16
Supplement: 12917_2019_2095_MOESM3_ESM.pdf [file 12917_2019_2095_MOESM3_ESM.pdf]

| Author(s), Year              | Study                                                                                                                                                    | Country             | Definition of Lameness/<br>Locomotion Scoring System                                                                           | Number<br>of<br>animals | Housing<br>system       |
|------------------------------|----------------------------------------------------------------------------------------------------------------------------------------------------------|---------------------|--------------------------------------------------------------------------------------------------------------------------------|-------------------------|-------------------------|
| Adams et al. (2017)          | Associations between housing and management practices and the prevalence of lameness, hock lesions, and thin cows on US dairy operations                 | USA                 | Score $\geq 2$ on a 3-point scale (1 = sound, 2 = mildly/moderately lame, 3 = severely lame)                                   | 22,042                  | Free stall<br>Tie stall |
| Alban (1995)                 | Lameness in Danish dairy cows- frequency and possible risk factors                                                                                       | Denmark             | Contusion, foul in the foot, sole ulcer, foot rot, interdigital dermatitis, laminitis, swollen hock, arthritis, other lameness | 9,762                   | Free stall<br>Tie stall |
| Alban et al. (1996)          | Lameness in tied Danish dairy cattle: The possible influence of housing systems, management, milk yield, and prior incidents of lameness                 | Denmark             | Foul in the foot (interdigital necrobacillosis), hock lesions (tarsal cellulitis and its sequelae)                             | 26,499                  | Tie stall               |
| Andreasen and Forkman (2012) | The welfare of dairy cows is improved in relation to cleanliness and integument alterations on the hocks and lameness when sand is used as stall surface | Denmark             | Score $\geq 1$ on a 3-point scale (0=not lame, 1=lame, 2=severely lame)                                                        | 2,573                   | Free stall              |
| Battagin et al. (2013)       | Genetic parameters for body condition score, locomotion, angularity, and production traits in Italian Holstein cattle                                    | Italy               | Not specified                                                                                                                  | 44,218                  | Free stall<br>Tie stall |
| Becker et al. (2014b)        | Lameness and foot lesions in Swiss dairy cows: II. Risk factors                                                                                          | Switzerland         | Score $\geq 2$<br>Sprecher et al. (1997)                                                                                       | 1,449                   | Free stall<br>Tie stall |
| Bernardi et al. (2009)       | The stall-design paradox: Neck rails increase lameness but improve udder and stall hygiene                                                               | Canada              | Not specified, scoring system by Flower and Weary (2006)                                                                       | 32                      | Free stall              |
| Boettcher et al. (1998)      | Genetic analysis of clinical lameness in dairy cattle                                                                                                    | Canada/USA          | Score $\geq 2$<br>Wells et al. (1993a)<br>Wells et al. (1993b)                                                                 | 1,342                   | Free stall              |
| Bouffard et al. (2017)       | Effect of following recommendations for tiestall configuration on neck and leg lesions, lameness, cleanliness, and lying time in dairy cows              | Canada              | Exhibition of $\geq 2$ of the behaviours<br>Leach et al. (2009), adapted by Gibbons et al. (2014)                              | 3,436                   | Tie stall               |
| Chapinal et al. (2013)       | Herd-level risk factors for lameness in freestall farms in the northeastern United States and California                                                 | Canada/USA          | Numerical Rating Score $\geq 3$<br>Flower and Weary (2006),<br>Chapinal et al. (2009)                                          | 14,112                  | Free stall              |
| Chapinal et al. (2014)       | Risk factors for lameness and hock injuries in Holstein herds in China                                                                                   | China               | Numerical Rating Score $\geq 3$<br>Flower and Weary (2006)<br>Chapinal et al. (2009)                                           | Not available           | Free stall              |
| Cook (2003)                  | Prevalence of lameness among dairy cattle in Wisconsin as a function of housing type and stall surface                                                   | USA                 | Score $\geq 3$ on a 4-point scale<br>1=no gait abnormality, 2=slight lameness, 3=moderate lameness, 4=severe lameness          | 3,621                   | Free stall<br>Tie stall |
| Cook et al. (2016)           | Management characteristics, lameness, and body injuries of dairy cattle housed in high-performance dairy herds in Wisconsin                              | USA                 | Score $\geq 3$<br>Sprecher et al. (1997)                                                                                       | 9,690                   | Free stall              |
| Dembele et al. (2006)        | Factors contributing to the incidence and prevalence of lameness on Czech dairy farms                                                                    | Czech Republic      | Any degree of limping on one or more legs                                                                                      | Not available           | Free stall              |
| Dippel et al. (2009a)        | Risk factors for lameness in cubicle housed Austrian Simmental dairy cows                                                                                | Austria/<br>Germany | Score $\geq 3$<br>Winckler and Willen (2001)                                                                                   | 832                     | Free stall              |
| Dippel et al. (2009b)        | Risk factors for lameness in freestall-housed dairy cows across two breeds, farming systems, and countries                                               | Austria/<br>Germany | Score $\geq 3$<br>Winckler and Willen (2001)                                                                                   | 3,514                   | Free stall              |
| Espejo et al. (2006)         | Prevalence of lameness in high-producing Holstein cows housed in freestall barns in Minnesota                                                            | USA                 | Score $\geq 3$<br>Sprecher et al. (1997)                                                                                       | 5,626                   | Free stall              |

|                            |                                                                                                                                                                                               |             |                                                                                                                                                                                                                  |                                       |                         |
|----------------------------|-----------------------------------------------------------------------------------------------------------------------------------------------------------------------------------------------|-------------|------------------------------------------------------------------------------------------------------------------------------------------------------------------------------------------------------------------|---------------------------------------|-------------------------|
| Espejo and Endres (2007)   | Herd-level risk factors for lameness in high-producing Holstein cows housed in freestall barns                                                                                                | USA         | Score $\geq 3$<br>Sprecher et al. (1997)                                                                                                                                                                         | 5,626                                 | Free stall              |
| Faye and Lescourret (1989) | Environmental factors associated with lameness in dairy cattle                                                                                                                                | France      | Not specified                                                                                                                                                                                                    | 1,712                                 | Free stall<br>Tie stall |
| Foditsch et al. (2016)     | Lameness Prevalence and Risk Factors in Large Dairy Farms in Upstate New York. Model Development for the Prediction of Claw Horn Disruption Lesions                                           | USA         | Visual locomotion score $\geq 2$<br>Bicalho et al. (2007a)                                                                                                                                                       | 7,687                                 | Free stall              |
| Frankena et al. (2009)     | The effect of digital lesions and floor type on locomotion score in Dutch dairy cows                                                                                                          | Netherlands | Score $\geq 3$<br>Manson and Leaver (1988)                                                                                                                                                                       | 225                                   | Free stall              |
| Green et al. (2010)        | Associations between lesion-specific lameness and the milk yield of 1,635 dairy cows from seven herds in the Xth region of Chile and implications for management of lame dairy cows worldwide | Chile       | Foot lesions causing lameness, diagnosed and recorded by farmers                                                                                                                                                 | 1,635                                 | Free stall              |
| Green et al. (2014)        | Temporal associations between low body condition, lameness and milk yield in a UK dairy herd                                                                                                  | UK          | Identifiable impaired mobility                                                                                                                                                                                   | 1,137                                 | Free stall              |
| Groehn et al. (1992)       | Risk factors associated with lameness in lactating dairy cattle in Michigan                                                                                                                   | USA         | any abnormality in locomotion as determined by producer or farm veterinarian or both                                                                                                                             | 3,610                                 | Free stall<br>Tie stall |
| Gudaj (2012)               | Associations between the occurrence of lameness, number of orthopaedic blocks used by hoof trimmers and management risk factors in dairy cow herds                                            | Hungary     | Score $\geq 3$<br>Sprecher et al. (1997)                                                                                                                                                                         | 11,422                                | Free stall              |
| Hedges et al. (2001)       | A Longitudinal Field Trial of the Effect of Biotin on Lameness in Dairy Cows                                                                                                                  | UK          | Not specified                                                                                                                                                                                                    | 900                                   | Free stall              |
| Hettich et al. (2007)      | Factors associated to lameness in 50 dairy herds in the X-th Region, Chile                                                                                                                    | Chile       | Sprecher et al. (1997), modified by Tadich et al. (2005)                                                                                                                                                         | 7,501                                 | Free stall              |
| Hirst et al. (2002)        | A mixed-effects time-to-event analysis of the relationship between first-lactation lameness and subsequent lameness in dairy cows in the UK                                                   | UK          | Not specified                                                                                                                                                                                                    | 611                                   | Free stall              |
| Hultgren (2007)            | Alley-floor design, claw lesions and locomotion in Swedish loose-housed dairy cattle                                                                                                          | Sweden      | Score $\geq 1$<br>Sprecher et al. (1997), modified                                                                                                                                                               | 183                                   | Free stall              |
| King et al. (2017)         | Cow-level associations of lameness, behavior, and milk yield of cows milked in automated systems                                                                                              | Canada      | Score $\geq 3$<br>Flower and Weary (2006)                                                                                                                                                                        | 1,218                                 | Free stall              |
| King et al. (2016)         | Associations of herd-level housing, management, and lameness prevalence with productivity and cow behavior in herds with automated milking systems                                            | Canada      | Score $\geq 3$<br>Flower and Weary (2006)                                                                                                                                                                        | 1,230                                 | Free stall              |
| Manske (2002) <sup>1</sup> | Hoof lesions and lameness in Swedish dairy cattle: prevalence, risk factors, effects of claw trimming, and consequences for productivity                                                      | Sweden      | Partly specified<br>Score $\geq 1$ on a 3-point scale (0=sound, 1=mild variation from normal gait, 2=clearly favouring one or more limbs, 3=extremely unwilling to put weight on one or more limbs or recumbent) | 4,899/<br>3,444/<br>2368 <sup>1</sup> | Free stall<br>Tie stall |
| Morabito et al. (2017)     | Effects of changing freestall area on lameness, lying time, and leg injuries on dairy farms in Alberta, Canada                                                                                | Canada      | Presence of limp<br>Solano et al. (2015)<br>Vasseur et al. (2015)                                                                                                                                                | 839                                   | Free stall              |
| Newsome et al. (2017)      | A prospective cohort study of digital cushion and corium thickness. Part 2: Does thinning of the digital cushion and                                                                          | UK          | Score $\geq 2$<br>Thomas et al. (2015)                                                                                                                                                                           | 179                                   | Free stall              |

|                               |                                                                                                                                                        |                                               |                                                                                                                 |               |                         |
|-------------------------------|--------------------------------------------------------------------------------------------------------------------------------------------------------|-----------------------------------------------|-----------------------------------------------------------------------------------------------------------------|---------------|-------------------------|
|                               | corium lead to lameness and claw horn disruption lesions                                                                                               |                                               |                                                                                                                 |               |                         |
| O'Driscoll et al. (2009)      | The effect of floor surface on dairy cow immune function and locomotion score                                                                          | Ireland                                       | Not specified, scoring system by O'Callaghan et al. (2003), modified                                            | 27            | Free stall              |
| Oikonomou et al. (2011)       | Effect of polymorphisms at the STAT5A and FGF2 gene loci on reproduction, milk yield and lameness of Holstein cows                                     | Greece                                        | Not specified, scoring system by Sprecher et al. (1997)                                                         |               | Free stall              |
| Onyiro et al. (2008)          | Risk factors and milk yield losses associated with lameness in Holstein-Friesian dairy cattle                                                          | Scotland                                      | Not specified, scoring system by Manson and Leaver (1988)                                                       | 248           | Free stall              |
| Perez-Cabal and Alenda (2014) | Clinical lameness and risk factors in a Spanish Holstein population                                                                                    | Spain                                         | Gait abnormality                                                                                                | 3,459         | Free stall              |
| Potzsch et al. (2003)         | The impact of parity and duration of biotin supplementation on white line disease lameness in dairy cattle                                             | UK                                            | white line lameness, when examining veterinarian considered that a white line disease was the cause of lameness | 900           | Free stall              |
| Ristevski et al. (2017a)      | Influence of body condition score and ultrasound-determined thickness of body Fat deposit in Holstein-Friesian cows on the risk of lameness developing | Croatia/<br>Macedonia/<br>Serbia              | Score $\geq 3$<br>Sprecher et al. (1997)                                                                        | 100           | Free stall              |
| Ristevski et al. (2017b)      | Milk production, body condition score and metabolic parameters at the peak of lactation as risk factors for chronic lameness in dairy cows             | Croatia/<br>Macedonia/<br>Serbia/<br>Slovenia | Score $\geq 3$<br>Sprecher et al. (1997)                                                                        | 100           | Free stall              |
| Rouha-Mulleder et al. (2009)  | Relative importance of factors influencing the prevalence of lameness in Austrian cubicle loose-housed dairy cows                                      | Austria                                       | Not specified, scoring system by Winckler and Willen (2001)                                                     | 2,360         | Free stall              |
| Sadiq et al. (2017)           | Prevalence of lameness, claw lesions, and associated risk factors in dairy farms in Selangor, Malaysia                                                 | Malaysia                                      | Score $\geq 3$<br>DairyCo (2007)                                                                                | 251           | Free stall              |
| Sarjokari et al. (2013)       | Prevalence and risk factors for lameness in insulated free stall barns in Finland                                                                      | Finland                                       | Score $\geq 3$<br>Sprecher et al. (1997), modified                                                              | 3,459         | Free stall              |
| Sogstad et al. (2005)         | Lameness and claw lesions of the Norwegian red dairy cattle housed in free stalls in relation to environment, parity and stage of lactation            | Norway                                        | Not specified                                                                                                   | 1,540         | Free stall              |
| Solano et al. (2015)          | Prevalence of lameness and associated risk factors in Canadian Holstein-Friesian cows housed in freestall barns                                        | Canada                                        | Score $\geq 3$<br>Flower and Weary (2006)                                                                       | 4981          | Free stall              |
| Weber et al. (2013)           | Genetic parameters for lameness and claw and leg diseases in dairy cows                                                                                | Germany                                       | Score $\geq 3$<br>Sprecher et al. (1997)                                                                        | 326           | Free stall              |
| Wells et al. (1993a)          | Individual cow risk factors for clinical lameness in lactating dairy cows                                                                              | USA                                           | Score $\geq 2$ on a 5-point scale (0=none, 1=mild, 2=moderate, 3=severe, 4=non-ambulatory)                      | 1,654         | Free stall              |
| Wells et al. (1995a)          | Effect of long-term administration of a prolonged release formulation of bovine somatotropin (Sometribove) on clinical lameness in dairy-cows          | USA                                           | Score $\geq 2$ on a 4-point scale (0=none, 1=mild, 2=moderate, 3=severe )                                       | 188           | Free stall              |
| Wells et al. (1995b)          | Some risk factors associated with clinical lameness in dairy herds in Minnesota and Wisconsin                                                          | USA                                           | Score $\geq 2$ on a 5-point scale (0=none, 1=mild, 2=moderate, 3=severe, 4=non-ambulatory)                      | Not available | Free stall<br>Tie stall |
| Westin et al. (2016b)         | Cow- and farm-level risk factors for lameness on dairy farms with automated milking systems                                                            | Canada                                        | Presence of obvious limp<br>Flower and Weary (2006)                                                             | 1,378         | Free stall              |
| Wongsanit (2015)              | Prevalence and risk factors for lameness in dairy cows raised in small holder farms in western Thailand                                                | Thailand                                      | Score $\geq 3$<br>Sprecher et al. (1997)                                                                        | 1,151         | Free stall<br>Tie stall |

|                      |                                                                                                                   |        |                                          |       |            |
|----------------------|-------------------------------------------------------------------------------------------------------------------|--------|------------------------------------------|-------|------------|
| Yaylak et al. (2010) | The effects of several cow and herd level factors on lameness in Holstein cows reared in Izmir Province of Turkey | Turkey | Score $\geq 3$<br>Sprecher et al. (1997) | 1,078 | Free stall |
|----------------------|-------------------------------------------------------------------------------------------------------------------|--------|------------------------------------------|-------|------------|

<sup>1</sup>doctoral thesis consisting of four research papers:

Manske, T., J. Hultgren, and C. Bergsten. 2002a. Prevalence and interrelationships of hoof lesions and lameness in Swedish dairy cows. *Prev Vet Med.* 54:247-263

Manske, T., J. Hultgren, and C. Bergsten. 2002b. A cross-sectional study of risk factors for the hoof health of Swedish dairy cattle. Unpublished

Manske, T., J. Hultgren, and C. Bergsten. 2002c. The effect of claw trimming on the hoof health of Swedish dairy cattle. *Prev Vet Med.* 54:113-129

Hultgren, J., T. Manske, C. Bergsten. 2004. Associations of sole ulcer at claw trimming with reproductive performance udder health, and culling in Swedish dairy cattle. *Prev Vet Med.* 62:233-251
