# Supplementary material for: A systematic review and meta-analyses of risk factors associated with lameness in dairy cows
Source: PubMed Central journal article supplement (PMC6796431; doi:10.1186/s12917-019-2095-2), 2019-10-16
Supplement: 12917_2019_2095_MOESM4_ESM.pdf [file 12917_2019_2095_MOESM4_ESM.pdf]

| Risk factor | Study                                                                                                                                                                                                                                                                                                                                                                                                                                                                                                                                                                                                             |
|-------------|-------------------------------------------------------------------------------------------------------------------------------------------------------------------------------------------------------------------------------------------------------------------------------------------------------------------------------------------------------------------------------------------------------------------------------------------------------------------------------------------------------------------------------------------------------------------------------------------------------------------|
| Parity      | Alban et al., 1996<br>Alban L., 1995<br>Boettcher et al., 1998<br>Dippel et al., 2009a<br>Dippel et al., 2009b<br>Espejo et al., 2006<br>Foditsch et al., 2016<br>Green et al., 2014<br>Groehn et al., 1992<br>Hedges et al., 2001<br>Hultgren et al., 2007<br>King et al., 2017<br>Manske, 2002b<br>Manske, 2002c<br>Morabito et al., 2017<br>Newsome et al., 2017<br>O'Driscoll et al., 2009<br>Potzsch et al., 2003<br>Sadiq et al., 2017<br>Sarjokari et al., 2013<br>Sogstad et al., 2005<br>Solano et al., 2015<br>Weber et al., 2013<br>Wells et al., 1993a<br>Westin et al., 2016b<br>Yaylak et al., 2010 |
| BCS         | Becker et al., 2014b<br>Dippel et al., 2009a<br>Dippel et al., 2009b<br>Foditsch et al., 2016<br>Green et al., 2014<br>Gudaj et al., 2012<br>King et al., 2017<br>Morabito et al., 2017<br>Onyiro et al., 2008<br>Ristevski et al., 2017a<br>Ristevski et al., 2017b<br>Sadiq et al., 2017<br>Solano et al., 2015<br>Wells et al., 1993a<br>Westin et al., 2016b<br>Yaylak et al., 2010                                                                                                                                                                                                                           |
| DIM         | Boettcher et al., 1998<br>Espejo et al., 2006<br>Green et al., 2014<br>Manske, 2002b<br>Manske, 2002c<br>Morabito et al., 2017<br>Pérez-Cabal et al., 2014<br>Sadiq et al., 2017<br>Weber et al., 2013<br>Wells et al., 1993a                                                                                                                                                                                                                                                                                                                                                                                     |
| Herd size   | Adams et al., 2017<br>Alban L., 1995<br>Chapinal et al., 2014<br>Chapinal et al., 2013<br>Dippel et al., 2009b<br>Faye et al., 1989<br>Groehn et al., 1992<br>Solano et al., 2015                                                                                                                                                                                                                                                                                                                                                                                                                                 |

|                                                |                                                                                                                                                                                                              |
|------------------------------------------------|--------------------------------------------------------------------------------------------------------------------------------------------------------------------------------------------------------------|
|                                                | Westin et al., 2016b<br>Yaylak et al., 2010                                                                                                                                                                  |
| Flooring surface type (concrete, rubber, etc.) | Adams et al., 2017<br>Faye et al., 1989<br>Frankena et al., 2009<br>Hettich et al., 2007<br>Hultgren et al., 2007<br>Manske, 2002b<br>Manske, 2002c<br>Rouha-Mulleder et al., 2009<br>Wongsanit et al., 2015 |
| Bedding type                                   | Adams et al., 2017<br>Chapinal et al., 2014<br>Chapinal et al., 2013<br>Cook et al., 2016<br>Groehn et al., 1992<br>Pérez-Cabal et al., 2014<br>Rouha-Mulleder et al., 2009                                  |
| Flooring type (slatted, solid)                 | Adams et al., 2017<br>Dippel et al., 2009b<br>Frankena et al., 2009<br>Hultgren et al., 2007<br>Pérez-Cabal et al., 2014<br>Rouha-Mulleder et al., 2009<br>Sarjokari et al., 2013                            |
| Frequency of claw trimming                     | Adams et al., 2017<br>Becker et al., 2014b<br>Espejo et al., 2007<br>Manske, 2002b<br>Pérez-Cabal et al., 2014<br>Wongsanit et al., 2015                                                                     |
| Milk yield                                     | Battagin et al., 2013<br>Green et al., 2014<br>Green et al., 2010<br>Pérez-Cabal et al., 2014<br>Ristevski et al., 2017b<br>Solano et al., 2015                                                              |
| Stall surface/base <sup>1</sup>                | Andreasen and Forkman., 2012<br>Cook, 2003<br>Dippel et al., 2009a<br>Dippel et al., 2009b<br>Solano et al., 2015<br>Westin et al., 2016b                                                                    |
| Availability of outside exercise area          | Adams et al., 2017<br>Becker et al., 2014<br>Dippel et al., 2009b<br>Rouha-Mulleder et al., 2009<br>Wells et al., 1995b                                                                                      |
| Claw overgrowth                                | Dembele et al., 2006<br>Morabito et al., 2017<br>Sadiq et al., 2017<br>Solano et al., 2015<br>Wells et al., 1993a                                                                                            |
| Season                                         | Cook, 2003<br>Foditsch et al., 2016<br>Green et al., 2014<br>Groehn et al., 1992<br>Onyiro et al., 2008                                                                                                      |
| Housing type                                   | Adams et al., 2017<br>Groehn et al., 1992<br>Pérez-Cabal et al., 2014                                                                                                                                        |

|                                     |                                                                                               |
|-------------------------------------|-----------------------------------------------------------------------------------------------|
|                                     | Wongsanit et al., 2015                                                                        |
| Presence of footbath                | Adams et al., 2017<br>Gudaj et al., 2012<br>Hettich et al., 2007<br>Pérez-Cabal et al., 2014  |
| Stall width                         | Bouffard et al., 2017<br>Dippel et al., 2009b<br>Sogstad et al., 2005<br>Westin et al., 2016b |
| Access to pasture                   | Chapinal et al., 2013<br>Pérez-Cabal et al., 2014<br>Wells et al., 1995b                      |
| Bedding quantity                    | Morabito et al., 2017<br>Solano et al., 2015<br>Westin et al., 2016b                          |
| Floor slipperiness                  | Dembele et al., 2006<br>Sarjokari et al., 2013<br>Solano et al., 2015                         |
| Frequency of manure removal         | Chapinal et al., 2013<br>King et al., 2016<br>Yaylak et al., 2010                             |
| General cleanliness                 | Becker et al., 2014b<br>Dembele et al., 2006<br>Sadiq et al., 2017                            |
| Milk protein content                | Battagin et al., 2013<br>Dippel et al., 2009b<br>Pérez-Cabal et al., 2014                     |
| Neck rail distance to rear curb     | Chapinal, 2013<br>Dippel et al., 2009a<br>Rouha-Mulleder et al., 2009                         |
| Presence of hock injuries           | Morabito et al., 2017<br>Solano et al., 2015<br>Westin et al., 2016b                          |
| Breed                               | Alban L., 1995<br>Sarjokari et al., 2013                                                      |
| Brisket board height                | Espejo et al., 2007<br>Westin et al., 2016b                                                   |
| Calving season                      | Alban et al., 1996<br>Alban L., 1995                                                          |
| Curb height                         | King et al., 2016<br>Rouha-Mulleder et al., 2009                                              |
| Length of stalls                    | Faye et al., 1989<br>Wells et al., 1995b                                                      |
| Lunge space obstruction             | Dippel et al., 2009a<br>Westin et al., 2016b                                                  |
| Milk fat content                    | Battagin et al., 2013<br>Pérez-Cabal et al., 2014                                             |
| Occurrence of previous lameness     | Green et al., 2014<br>Hirst et al., 2002b                                                     |
| Pen area available per cow          | Westin et al., 2016b<br>Yaylak et al., 2010                                                   |
| Presence of rubber mats in walkways | Adams et al., 2017<br>Chapinal et al., 2013                                                   |
| Stocking density                    | King et al., 2016<br>Westin et al., 2016b                                                     |
| Supplementation of biotin           | Hedges et al., 2001<br>Potzsch et al., 2003                                                   |
| Temperature                         | King et al., 2017<br>King et al., 2016                                                        |
| Width of feed alley                 | Sarjokari et al., 2013<br>Westin et al., 2016b                                                |

|                                                                                     |                             |
|-------------------------------------------------------------------------------------|-----------------------------|
| Abnormal lying behaviour                                                            | Dippel et al., 2009b        |
| Angularity                                                                          | Battagin et al., 2013       |
| Animal keeper is owner                                                              | Yaylak et al., 2010         |
| Animal keeper is stockman                                                           | Yaylak et al., 2010         |
| Area behind brisket board filled with concrete                                      | Espejo et al., 2007         |
| Availability of feeding expert                                                      | Yaylak et al., 2010         |
| Barn age                                                                            | Chapinal et al., 2014       |
| Bedding cleanliness                                                                 | Gudaj et al., 2012          |
| Blood BHBA                                                                          | Ristevski et al., 2017b     |
| Blood LDH                                                                           | Ristevski et al., 2017b     |
| Blood Triglycerides                                                                 | Ristevski et al., 2017b     |
| Body weight                                                                         | Wells et al., 1993a         |
| Breed class                                                                         | Becker et al., 2014b        |
| Changing diet prior to calving                                                      | Hettich et al., 2007        |
| Cleanliness of udder                                                                | Becker et al., 2014b        |
| Cleanliness of flank                                                                | Becker et al., 2014b        |
| Cleanliness of legs                                                                 | Westin et al., 2016b        |
| Consideration of claw health in breeding                                            | Becker et al., 2014b        |
| Cow care quality                                                                    | Dembele et al., 2006        |
| Cow comfort                                                                         | Espejo et al., 2007         |
| Cow trainer use routine                                                             | Alban et al., 1996          |
| Diagnosis season of lameness event                                                  | Pérez-Cabal et al., 2014    |
| Distribution of maize silage                                                        | Faye et al., 1989           |
| Duration of cow-calf contact                                                        | Rouha-Mulleder et al., 2009 |
| Duration of rising process                                                          | Dippel et al., 2009b        |
| Farmer's expectation to be farmer in 5 years                                        | Alban L., 1995              |
| Farmer's opinion of importance of claw health                                       | Becker et al., 2014b        |
| Feed barrier type                                                                   | Sarjokari et al., 2013      |
| Feeding corn silage in spring                                                       | Wells et al., 1995b         |
| Feeding dry concentrate in summer                                                   | Wells et al., 1995b         |
| Feeding dry hay                                                                     | Groehn et al., 1992         |
| Feeding fresh forage in summer                                                      | Wells et al., 1995b         |
| Feeding hay in spring                                                               | Wells et al., 1995b         |
| Feeding haylage in spring/summer                                                    | Wells et al., 1995b         |
| Feeding silage                                                                      | Becker et al., 2014b        |
| Feeding space available per cow                                                     | Westin et al., 2016b        |
| Feeding wet concentrate in summer                                                   | Wells et al., 1995b         |
| Free stall care                                                                     | Morabito et al., 2017       |
| Frequency of footbath                                                               | Chapinal et al., 2013       |
| Frequency of raking stalls                                                          | Westin et al., 2016b        |
| Frequency of ration balancing                                                       | Wells et al., 1995b         |
| Frequency of visits by hoof trimmer                                                 | Adams et al., 2017          |
| Gutter width                                                                        | Wells et al., 1995b         |
| Herd milk yield                                                                     | Alban et al., 1996          |
| Hock condition score                                                                | Sadiq et al., 2017          |
| Hours/day spent in free stalls                                                      | Wells et al., 1995b         |
| Hours/day spent in stanchions                                                       | Wells et al., 1995b         |
| Hours/day spent in tie stalls                                                       | Wells et al., 1995b         |
| Implementation of cow comfort assessment                                            | Morabito et al., 2017       |
| Length of lying area                                                                | Dippel et al., 2009b        |
| Long-term administration of sometribove (methionyl bovine somatotropin, 500mg, sc.) | Wells et al., 1995a         |
| Manure removal strategy                                                             | Hultgren et al., 2007       |
| Number of cows per milking robot                                                    | Westin et al., 2016b        |
| Milking cows that are obviously ill                                                 | Gudaj et al., 2012          |
| Number of lactating cows                                                            | Wells et al., 1995b         |
| Number of stalls                                                                    | Gudaj et al., 2012          |
| Percentage of fat cows                                                              | Rouha-Mulleder et al., 2009 |
| Percentage of stalls with fecal contamination                                       | Chapinal et al., 2013       |

|                                                                    |                         |
|--------------------------------------------------------------------|-------------------------|
| Polymorphism at STAT5A and FGF2 gene loci                          | Oikonomou et al., 2011  |
| Position of neck rail                                              | Bernardi et al., 2009   |
| Position of tie-rail                                               | Bouffard et al., 2017   |
| Presence and condition of stalls with dividers                     | Wells et al., 1995b     |
| Presence of deep swelling on limbs                                 | Wells et al., 1993a     |
| Presence of fans                                                   | Adams et al., 2017      |
| Presence of feed stalls                                            | Hultgren et al., 2007   |
| Presence of infection on limbs                                     | Wells et al., 1993a     |
| Presence of knee injuries                                          | Westin et al., 2016b    |
| Presence of laceration on limbs                                    | Wells et al., 1993a     |
| Presence of skin lesions                                           | Dembele et al., 2006    |
| Presence of sprinklers                                             | Adams et al., 2017      |
| Presence of superficial swelling on limbs                          | Wells et al., 1993a     |
| Presence of synovial swelling on limbs                             | Wells et al., 1993a     |
| Previous lactation claw horn disruption lesion-incidence           | Foditsch et al., 2016   |
| Promptness of treatment for lameness                               | Adams et al., 2017      |
| Proportion of cows in cubicles that are lying down                 | Dippel et al., 2009b    |
| Ratio of concentrate feed to total feed                            | Yaylak et al., 2010     |
| Rear lateral claw angle                                            | Wells et al., 1993a     |
| Rearing replacement heifers on site                                | Chapinal et al., 2013   |
| Soil area available per cow                                        | Yaylak et al., 2010     |
| Sole soft tissue thickness                                         | Newsome et al., 2017    |
| Surface moisture                                                   | Adams et al., 2017      |
| Thickness of fat over tuber ischiadicum                            | Ristevski et al., 2017a |
| Tie rail height                                                    | Bouffard et al., 2017   |
| Tie system                                                         | Alban et al., 1996      |
| Time away from pen                                                 | Espejo et al., 2007     |
| Time of claw trimming                                              | Manske, 2002c           |
| Type of water supply                                               | Sarjokari et al., 2013  |
| Water linear space per cow                                         | Chapinal et al., 2013   |
| Width of entranceway                                               | Wells et al., 1995b     |
| Within-herd prevalence of digital dermatitis and heel-horn erosion | Becker et al., 2014b    |

<sup>1</sup>The term “stall base” has been used ambiguously. Several studies regarded it as a synonym to “bedding”. Other studies did not follow that interpretation and referred to the composition of the surface beneath the bedding itself. Both terms are displayed separately.
