# Supplementary material for: A systematic review and meta-analyses of risk factors associated with lameness in dairy cows
Source: PubMed Central journal article supplement (PMC6796431; doi:10.1186/s12917-019-2095-2), 2019-10-16
Supplement: 12917_2019_2095_MOESM6_ESM.pdf [file 12917_2019_2095_MOESM6_ESM.pdf]

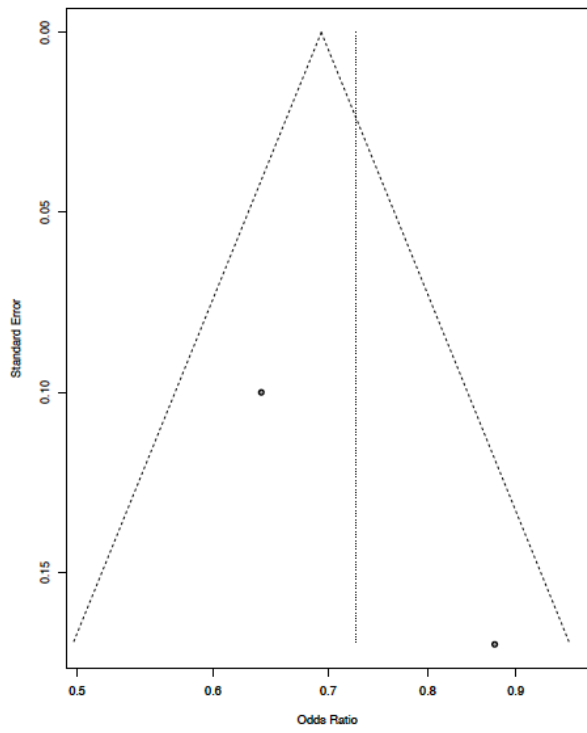

Funnel plot of the meta-analysis for BCS 3 vs BCS $\leq$ 2.5

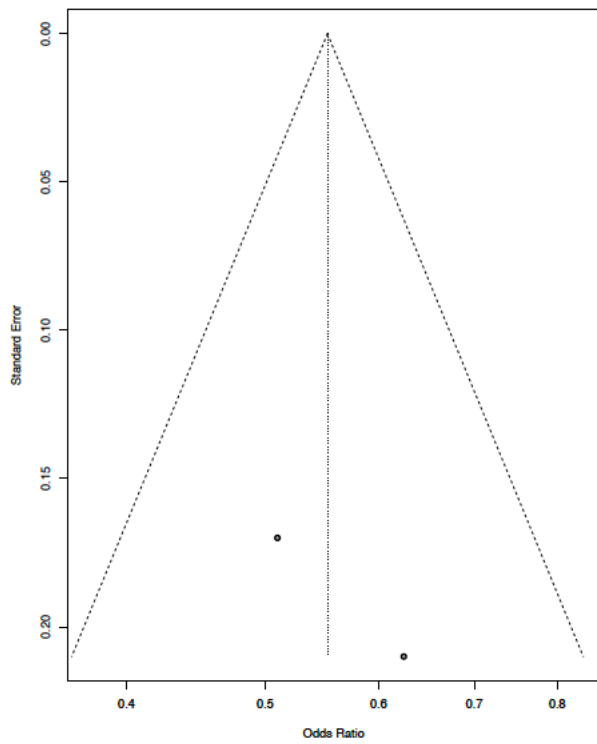

Funnel plot of the meta-analysis for BCS  $\geq$ 3.5 vs BCS $\leq$ 2.5

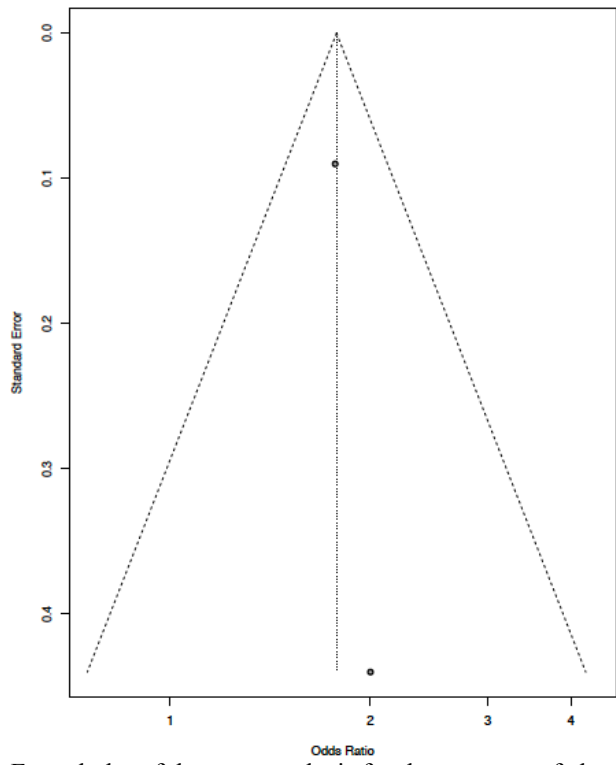

Funnel plot of the meta-analysis for the presence of claw overgrowth

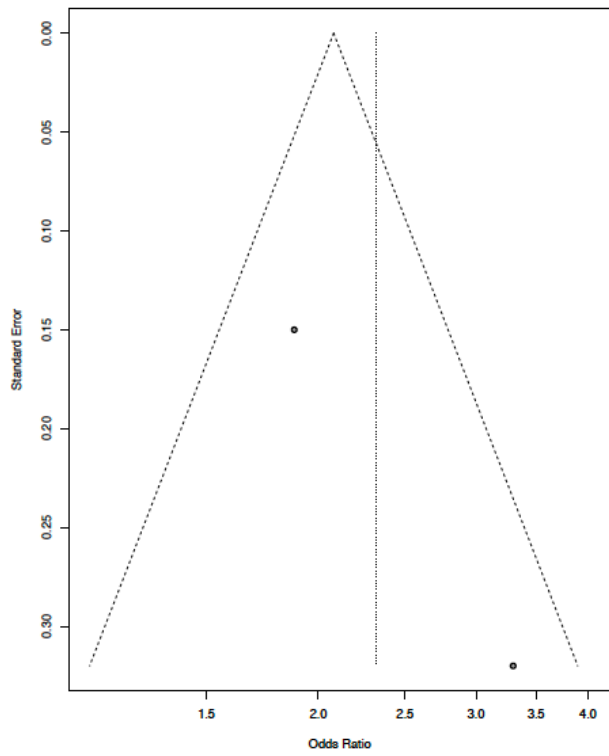

Funnel plot of the meta-analysis for stages of lactation ( $\leq 120$  DIM vs.  $> 120$  DIM)

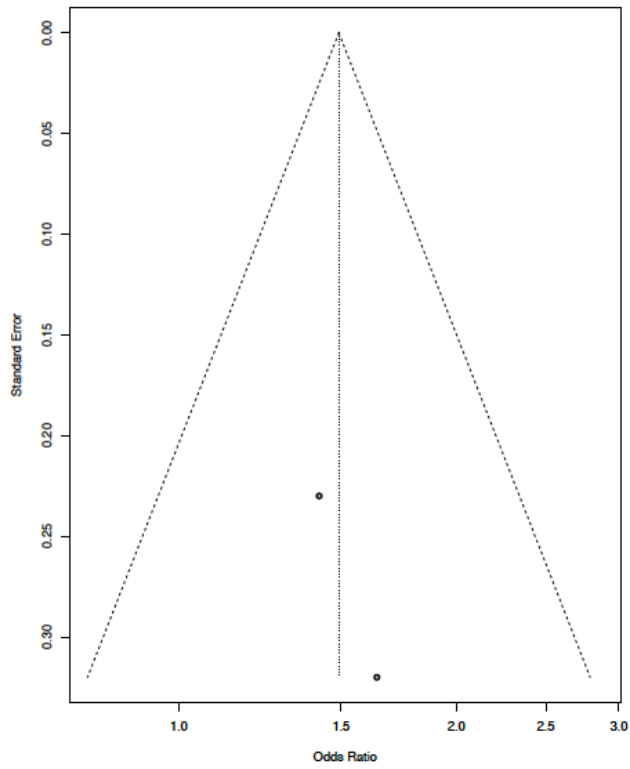

Funnel plot of the meta-analysis for herd size (30-50 animals vs.  $\leq 29$  animals)

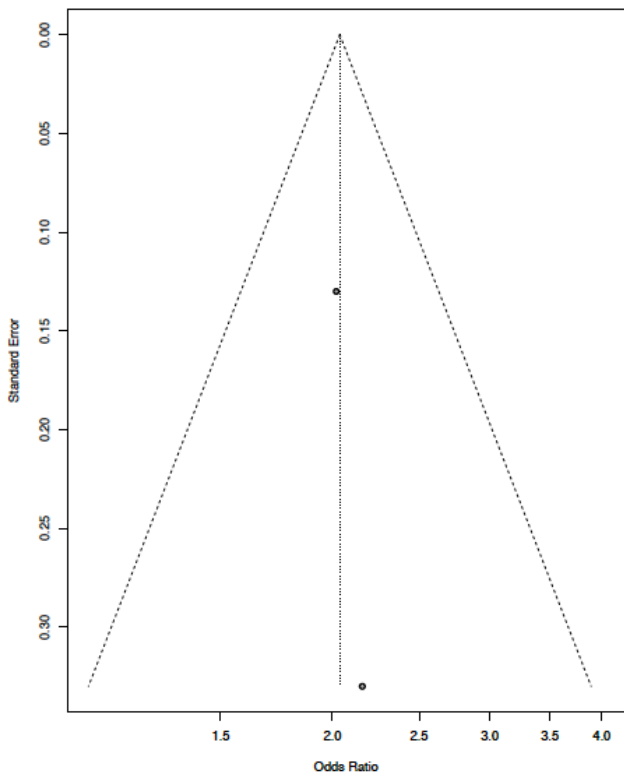

Funnel plot of the meta-analysis for herd size ( $\geq 50$  animals vs.  $\leq 29$  animals)

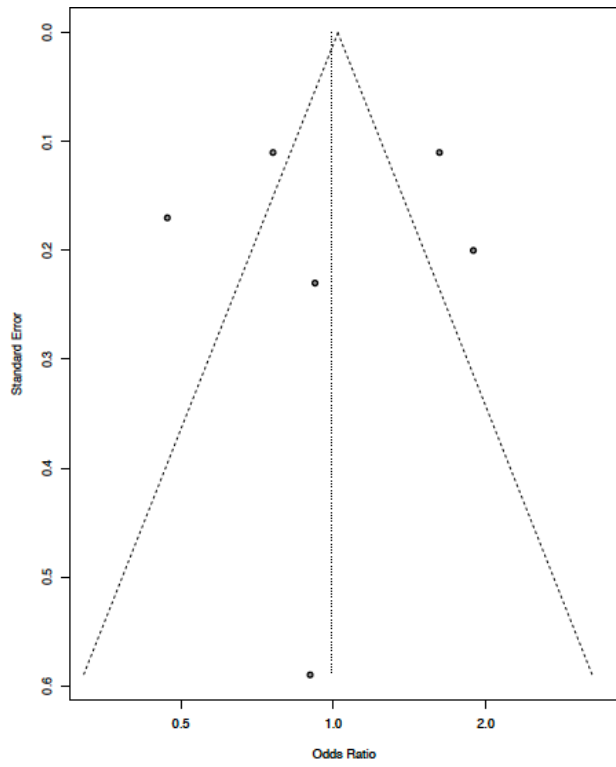

Funnel plot of the meta-analysis for parity (parity 2 vs. parity 1).

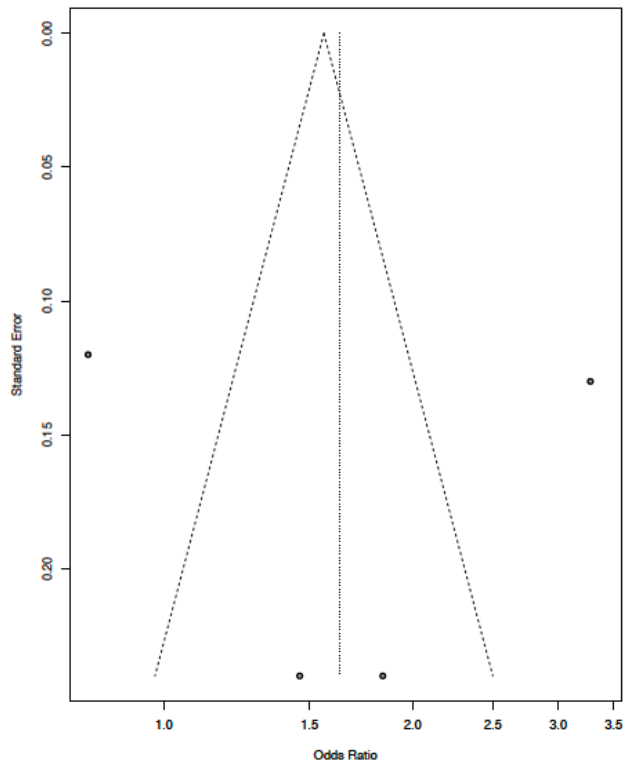

Funnel plot of the meta-analysis for parity (parity 3 vs. parity 1).

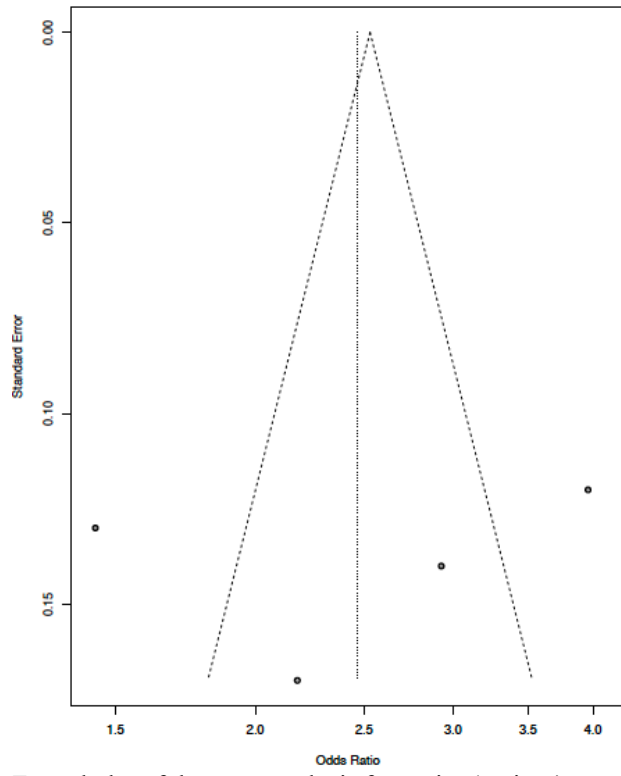

Funnel plot of the meta-analysis for parity (parity 4 vs. parity 1).
