# Supplementary material for: A systematic review and meta-analyses of risk factors associated with lameness in dairy cows
Source: PubMed Central journal article supplement (PMC6796431; doi:10.1186/s12917-019-2095-2), 2019-10-16
Supplement: 12917_2019_2095_MOESM8_ESM.pdf [file 12917_2019_2095_MOESM8_ESM.pdf]

The standard error was calculated as the square root from values obtained applying the following procedure

$$\sqrt{\frac{1}{n_{\text{sound BCS 3.0}}} + \frac{1}{n_{\text{lame BCS 3.0}}} + \frac{1}{n_{\text{sound BCS 2.5}}} + \frac{1}{n_{\text{lame BCS 2.5}}}}$$

and

$$\sqrt{\frac{1}{n_{\text{sound BCS 3.5}}} + \frac{1}{n_{\text{lame BCS 3.5}}} + \frac{1}{n_{\text{sound BCS 2.5}}} + \frac{1}{n_{\text{lame BCS 2.5}}}}$$
